# Supplementary material for: Goats naturally devoid of PrPC are resistant to scrapie
Source: Springer Nature journal article supplement (doi:10.1186/s13567-019-0731-2), 2020-01-10
Supplement: MOESM1 [file 13567_2019_731_MOESM1_ESM.pdf]

**Kinship matrix** (coefficients of relatedness)

| Goat | 417    | 529    | 536    | 451    | 469    | 527    | 533    | 413    | 457    | 476    | 490    |
|------|--------|--------|--------|--------|--------|--------|--------|--------|--------|--------|--------|
| 416  | 0,3036 | 0,1269 | 0,1143 | 0,0361 | 0,0286 | 0,0888 | 0,0242 | 0,1476 | 0,0235 | 0,0163 | 0,0239 |
| 417  |        | 0,1028 | 0,1152 | 0,0381 | 0,0341 | 0,0944 | 0,0303 | 0,0910 | 0,0258 | 0,0218 | 0,0314 |
| 529  |        |        | 0,0858 | 0,1124 | 0,1236 | 0,0836 | 0,0930 | 0,2148 | 0,1006 | 0,0243 | 0,0553 |
| 536  |        |        |        | 0,0607 | 0,0718 | 0,2817 | 0,1269 | 0,0758 | 0,0448 | 0,0906 | 0,1032 |
| 451  |        |        |        |        | 0,3512 | 0,0977 | 0,3019 | 0,0374 | 0,2980 | 0,1451 | 0,0239 |
| 469  |        |        |        |        |        | 0,1231 | 0,3053 | 0,0367 | 0,3145 | 0,1539 | 0,0348 |
| 527  |        |        |        |        |        |        | 0,1004 | 0,0557 | 0,0819 | 0,0904 | 0,0351 |
| 533  |        |        |        |        |        |        |        | 0,0313 | 0,2924 | 0,2166 | 0,0987 |
| 413  |        |        |        |        |        |        |        |        | 0,0336 | 0,0258 | 0,0494 |
| 457  |        |        |        |        |        |        |        |        |        | 0,1795 | 0,0690 |
| 476  |        |        |        |        |        |        |        |        |        |        | 0,2682 |

| Goat | Inbreeding coefficient |
|------|------------------------|
| 416  | 0.03322                |
| 417  | 0.00388                |
| 529  | 0.07347                |
| 536  | 0.01730                |
| 451  | 0.05512                |
| 469  | 0.06789                |
| 527  | 0.02739                |
| 533  | 0.01435                |
| 413  | 0.00701                |
| 457  | 0.01873                |
| 476  | 0.00198                |
| 490  | 0.02062                |

**Average coefficients of relatedness:**

All **0,108** **10,8**      Range: 0,016 -0,35 (1,6 - 35 %)

|                             |       |      |
|-----------------------------|-------|------|
| Normal +/+                  | 0,141 | 14,1 |
| Heterozygotic +/Ter         | 0,213 | 21,3 |
| Homozygotic Ter/Ter         | 0,104 | 10,4 |
| Normal - heterozygotic      | 0,083 | 8,3  |
| Normal - homozygotic        | 0,068 | 6,8  |
| Heterozygotic - Homozygotic | 0,122 | 12,2 |
