# Supplementary material for: Goats naturally devoid of PrPC are resistant to scrapie
Source: Springer Nature journal article supplement (doi:10.1186/s13567-019-0731-2), 2020-01-10
Supplement: MOESM2 [file 13567_2019_731_MOESM2_ESM.pdf]

# NEUROLOGICAL EXAMINATION OF GOATS

DATE:

ANIMAL NO:

(✓ if normal , × if not able to observe, describe in detail if abnormal)

|                                                  |                                                                                                                                                       |                       |          |
|--------------------------------------------------|-------------------------------------------------------------------------------------------------------------------------------------------------------|-----------------------|----------|
| 1. Posture / Head Carriage                       |                                                                                                                                                       |                       |          |
| 2. Abnormal Movements / Tremors / Fasciculations | None <input type="checkbox"/> / Yes <input type="checkbox"/> (describe):                                                                              |                       |          |
| 3. Mental Status                                 |                                                                                                                                                       |                       |          |
| 4. Behaviour                                     | Resting (left alone):                                                                                                                                 | Approached:           | Handled: |
|                                                  |                                                                                                                                                       |                       |          |
|                                                  | Symmetry (tick if all normal, or describe)                                                                                                            | Left                  | Right    |
| <b>FACE / NECK</b>                               |                                                                                                                                                       |                       |          |
| 5. Olfaction (CN I)                              |                                                                                                                                                       |                       |          |
| 6. Vision (CN II)                                |                                                                                                                                                       |                       |          |
| 7. Eye position (CN III, IV, VI)                 |                                                                                                                                                       |                       |          |
| 8. Menace response (CN II ++)                    |                                                                                                                                                       |                       |          |
| 9. Palpebra reflex (CN V, CN VII)                |                                                                                                                                                       |                       |          |
| 10. Ears (position/reaction to touch)            |                                                                                                                                                       |                       |          |
| 11. Lips (CN VII) (reaction to touch)            |                                                                                                                                                       |                       |          |
| 12. Nose (CN VII) (reaction to touch)            |                                                                                                                                                       |                       |          |
| 13. Hearing (CN VIII)                            |                                                                                                                                                       |                       |          |
| 14. Swallow (CN IX, CN X) (on palpation)         |                                                                                                                                                       |                       |          |
| 15. Jaw position, tongue tone (CN XII)           |                                                                                                                                                       |                       |          |
| 16. Withdrawal reflex                            |                                                                                                                                                       |                       |          |
| 17. Salivation, dribbling                        | None <input type="checkbox"/> / Yes <input type="checkbox"/> (describe):                                                                              |                       |          |
| 18. Scratch/Nibble Test - Lumbar                 | Negative <input type="checkbox"/> / Inconclusive <input type="checkbox"/> / Inconsistent <input type="checkbox"/> / Positive <input type="checkbox"/> |                       |          |
| 19. Body condition                               |                                                                                                                                                       | Body condition score: |          |

20. Skin lesions: No  / Yes  - list areas and types/ draw below

21. Wool - hair loss: No  / Yes  - list areas and types/ draw below

22. Other Fleece change(s): No  / Yes  - list areas and types:  
also draw below (soiling/ changed fleece colour/ quality)

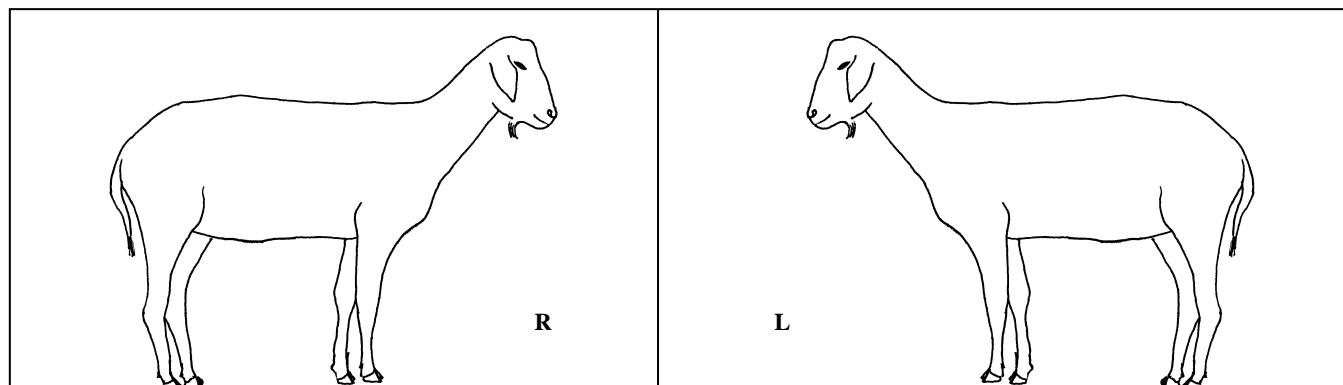

## GENERAL EXAMINATION

23. Temperature:

24. Heart rate:

**GAIT**

|                                          |                                                                                                  |
|------------------------------------------|--------------------------------------------------------------------------------------------------|
| 25. <b>Walking</b> (amount/willingness)  |                                                                                                  |
| 26. <b>Running</b> (amount/ willingness) |                                                                                                  |
| 27. <b>Slipping</b>                      | <b>No</b> <input type="checkbox"/> / <b>Yes</b> <input type="checkbox"/> (# of times, describe): |
| 28. <b>Falling</b>                       | <b>No</b> <input type="checkbox"/> / <b>Yes</b> <input type="checkbox"/> (# of times, describe): |
| 29. <b>Collides into walls</b>           | <b>No</b> <input type="checkbox"/> / <b>Yes</b> <input type="checkbox"/> (# of times, describe): |

|                          |                                                                                                                               |
|--------------------------|-------------------------------------------------------------------------------------------------------------------------------|
| <i>OVERALL GAIT:</i>     |                                                                                                                               |
| 30. <b>Stiff / lame</b>  | <b>No</b> <input type="checkbox"/> / <b>Yes</b> <input type="checkbox"/> – describe:                                          |
| 31. <b>Neurological</b>  | <b>No</b> <input type="checkbox"/> / <b>May be</b> <input type="checkbox"/> / <b>Yes</b> <input type="checkbox"/> – describe: |
| 32. <b>Other on gait</b> | <b>No</b> <input type="checkbox"/> / <b>Yes</b> <input type="checkbox"/> – describe:                                          |

|                                                                                                                                                                                                                                                                                                                                                                                                                                                                                                                                                                                                              |
|--------------------------------------------------------------------------------------------------------------------------------------------------------------------------------------------------------------------------------------------------------------------------------------------------------------------------------------------------------------------------------------------------------------------------------------------------------------------------------------------------------------------------------------------------------------------------------------------------------------|
| <p>33. <b>STATUS WITH REGARDS TO TSE &amp; OTHER DISEASES:</b></p> <ul style="list-style-type: none"> <li>- no evidence of TSE <input type="checkbox"/> Normal Animal <input type="checkbox"/> / Other abnormality (ies) <input type="checkbox"/></li> <li>- suspect TSE <input type="checkbox"/> → severity of case: early <input type="checkbox"/> - established <input type="checkbox"/> - advanced <input type="checkbox"/></li> <li style="padding-left: 20px;">→ list suggestive signs (by their # if many):</li> <li>- inconclusive with regards to TSE <input type="checkbox"/> , detail:</li> </ul> |
|--------------------------------------------------------------------------------------------------------------------------------------------------------------------------------------------------------------------------------------------------------------------------------------------------------------------------------------------------------------------------------------------------------------------------------------------------------------------------------------------------------------------------------------------------------------------------------------------------------------|

**HISTORY:**

| <b>ACTION</b>                                                                                          | <b>DATE COMPLETED</b> | <b>RESULT</b> |
|--------------------------------------------------------------------------------------------------------|-----------------------|---------------|
| Still photo: <b>No</b> <input type="checkbox"/> / <b>Yes</b> <input type="checkbox"/> (describe):      |                       |               |
| Video: <b>No</b> <input type="checkbox"/> / <b>Yes</b> <input type="checkbox"/> (describe):            |                       |               |
| Skin scraping: <b>No</b> <input type="checkbox"/> / <b>Yes</b> <input type="checkbox"/><br>(describe): |                       |               |
| Other (describe):<br>_____                                                                             |                       |               |

**Other Comments:**
