# Supplementary material for: Goats naturally devoid of PrPC are resistant to scrapie
Source: Springer Nature journal article supplement (doi:10.1186/s13567-019-0731-2), 2020-01-10
Supplement: MOESM3 [file 13567_2019_731_MOESM3_ESM.pdf]

## Quantitative PCR primer sequences

| Gene ID   | Symbol | Gene name                          | Primer sequences                                                |
|-----------|--------|------------------------------------|-----------------------------------------------------------------|
| 102179831 | ACTB   | Actin beta                         | F: 5'TGCCCTGAGGCTCTTTCCA<br>R: 5'TGCGGATGTCGACGTCACA            |
| 102169975 | PRNP   | Prion protein                      | F: 5'GTGGCTACATGCTGGGAAGT<br>R: 5'AGCCTGGGATTCTCTCTGGT          |
| 100860873 | CXCL10 | C-X-C motif chemokine<br>ligand 10 | F: 5'ACGCTGTACCTGCATCGAG<br>R: 5'GCAGGATTGACTTGCAGGA            |
| 102168428 | SAA3   | Serum amyloid A3                   | F: 5'CTGGGCTGCTAAAGTGATCAGTAAC<br>R: 5'CCCTTGAGCAGAGGGTCTGTGATT |
| 102182273 | S100A9 | S100 calcium-binding<br>protein A9 | F: GAGATCATGGAGGACCTGGA<br>R: GGCCACCAGCATAATGAACT              |
| 102177056 | CD14   | Cluster of differentiation 14      | F: CCACCCTCAGTCTCCGTAAC<br>R: GTGTGCTTGGGCAATGTTC               |
| 100860816 | IL1B   | Interleukin 1 beta                 | F: GACAACAAGATTCCTGTGGCC<br>R: TCTACTTCCTCCAGATGAAGTGT          |
| 102190069 | GFAP   | Glial fibrillary acidic protein    | F: CAGATCCGAGGGGGCAAAG<br>R: GGGGCTCCATCTACAACCTG               |
