# Supplementary material for: Goats naturally devoid of PrPC are resistant to scrapie
Source: Springer Nature journal article supplement (doi:10.1186/s13567-019-0731-2), 2020-01-10
Supplement: MOESM4 [file 13567_2019_731_MOESM4_ESM.pdf]

**Overview of PRNP polymorphisms in 12 goats.**

| <b>Goat#</b> | <b>32</b> | <b>220</b> | <b>240</b> |
|--------------|-----------|------------|------------|
| 416          | G/G       | L/L        | P/P        |
| 417          | G/G       | L/L        | P/P        |
| 529          | G/G       | L/L        | P/P        |
| 536          | G/G       | L/L        | P/P        |
| 413          | Ter/Ter   | Q/Q        | P/P        |
| 457          | Ter/Ter   | Q/Q        | P/P        |
| 476          | Ter/Ter   | Q/Q        | P/P        |
| 490          | Ter/Ter   | Q/Q        | P/P        |
| 451          | G/Ter     | Q/L        | P/P        |
| 469          | G/Ter     | Q/L        | P/P        |
| 533          | G/Ter     | Q/L        | S/S        |
| 527          | G/Ter     | Q/L        | P/S        |
