# Supplementary material for: Goats naturally devoid of PrPC are resistant to scrapie
Source: Springer Nature journal article supplement (doi:10.1186/s13567-019-0731-2), 2020-01-10
Supplement: MOESM5 [file 13567_2019_731_MOESM5_ESM.pdf]

## Semi-quantitative scoring of GFAP-positive astrocytes in thalamus and hippocampus

| Genotype                      | Goat# | Thalamus |     |     | Hippocampus     |     |     |                   |     |     |       |     |     |
|-------------------------------|-------|----------|-----|-----|-----------------|-----|-----|-------------------|-----|-----|-------|-----|-----|
|                               |       | S        | 1°  | 2°  | Molecular layer |     |     | Sub-granular zone |     |     | Hilus |     |     |
|                               |       | S        | 1°  | 2°  | S               | 1°  | 2°  | S                 | 1°  | 2°  | S     | 1°  | 2°  |
| <i>PRNP<sup>+/+</sup></i>     | 416   | 1.0      | 2.0 | 1.5 | 2.0             | 1.5 | 1.0 | 2.0               | 2.0 | 1.0 | 1.0   | 1.5 | 1.0 |
| <i>PRNP<sup>+/+</sup></i>     | 417   | 3.0      | 3.0 | 2.0 | 2.5             | 2.5 | 2.0 | 2.5               | 2.5 | 1.5 | 2.0   | 2.5 | 2.0 |
| <i>PRNP<sup>+/+</sup></i>     | 529   | 2.0      | 2.0 | 1.5 | 3.0             | 3.0 | 2.5 | 3.0               | 3.0 | 3.0 | 3.0   | 3.0 | 3.0 |
| <i>PRNP<sup>+/+</sup></i>     | 536   | 1.5      | 1.5 | 1.0 | 1.5             | 1.5 | 1.0 | 2.0               | 2.0 | 1.5 | 1.5   | 2.0 | 2.0 |
|                               |       | 1.9      | 2.1 | 1.5 | 2.3             | 2.1 | 1.6 | 2.4               | 2.4 | 1.8 | 1.9   | 2.3 | 2.0 |
| <i>PRNP<sup>+/Ter</sup></i>   | 451   | 2.5      | 3.0 | 2.0 | 2.5             | 1.5 | 1.5 | 2.0               | 2.0 | 1.5 | 2.0   | 3.0 | 2.0 |
| <i>PRNP<sup>+/Ter</sup></i>   | 469   | 1.5      | 2.0 | 1.5 | 2.5             | 2.5 | 2.0 | 3.0               | 2.5 | 2.5 | 2.5   | 2.5 | 2.5 |
| <i>PRNP<sup>+/Ter</sup></i>   | 527   | 3.0      | 3.0 | 2.0 | 3.0             | 2.5 | 2.5 | 3.0               | 2.5 | 2.5 | 2.5   | 2.0 | 2.0 |
| <i>PRNP<sup>+/Ter</sup></i>   | 533   | 2.0      | 2.0 | 2.0 | 1.5             | 2.0 | 2.0 | 1.5               | 1.5 | 1.5 | 1.0   | 0.5 | 0.5 |
|                               |       | 2.3      | 2.5 | 1.9 | 2.4             | 2.1 | 2.0 | 2.4               | 2.1 | 2.0 | 2.0   | 2.0 | 1.8 |
| <i>PRNP<sup>Ter/Ter</sup></i> | 413   | 1.5      | 1.5 | 1.0 | 2.0             | 2.5 | 2.0 | 2.5               | 2.5 | 2.0 | 2.0   | 2.5 | 2.0 |
| <i>PRNP<sup>Ter/Ter</sup></i> | 457   | 2.0      | 1.5 | 1.0 | 2.0             | 1.5 | 1.0 | 1.5               | 2.0 | 1.0 | 1.5   | 1.0 | 1.5 |
| <i>PRNP<sup>Ter/Ter</sup></i> | 476   | 1.0      | 1.0 | 1.0 | 2.5             | 2.0 | 2.0 | 1.5               | 1.5 | 1.0 | 1.0   | 1.5 | 1.0 |
| <i>PRNP<sup>Ter/Ter</sup></i> | 490   | 2.0      | 3.0 | 2.5 | 2.0             | 1.5 | 1.5 | 2.0               | 2.0 | 2.0 | 1.5   | 1.5 | 1.5 |
|                               |       | 1.6      | 1.8 | 1.4 | 2.1             | 1.9 | 1.6 | 1.9               | 2.0 | 1.5 | 1.5   | 1.6 | 1.5 |

**Abbreviations:** S, mean GFAP signal; 1°, primary processes length and thickness; 2°, secondary processes length and thickness
